# Supplementary material for: Controlled formation of flavor compounds by preparation and application of Maillard reaction intermediate (MRI) derived from xylose and phenylalanine
Source: Royal Society of Chemistry journal article supplement (doi:10.1039/c7ra09355a), 2017-01-01
Supplement: c7ra09355a1.pdf [file c7ra09355a1.pdf]

## Supplementary data

Below are the supplementary data for the total ion chromatograms for the chemical composition of samples (MRPs (non-heated), MRPs, MRI, Xyl-Phe) presented in Table 1 and the NMR spectra of the purified MRI.

### Figure Captions

Fig. S1. Total ion chromatograms of the samples shown in Table 1 (a: MRPs (non-heated); b: MRPs; c: MRI; d: Xyl-Phe)

Fig. S2.  $^{13}\text{C}$  NMR spectra (a), overall (b) and local (c)  $^1\text{H}$  NMR spectra of purified MRI

**Fig. S1**

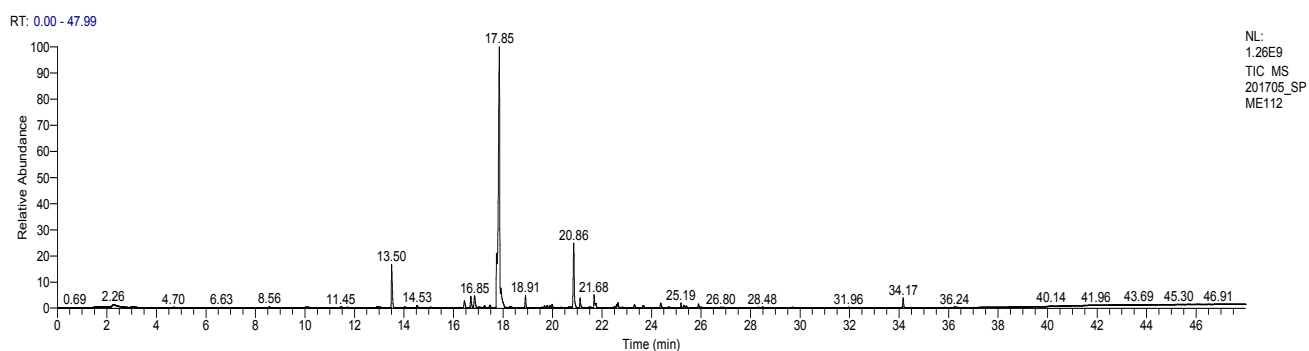

(a)

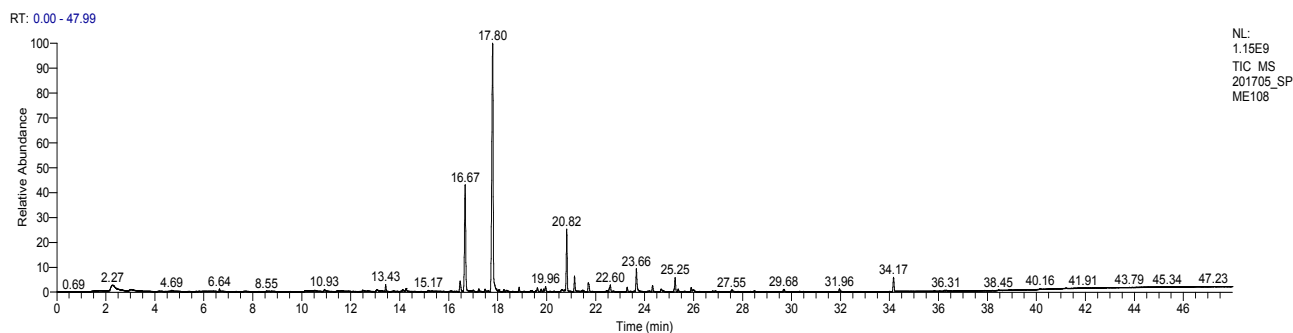

(b)

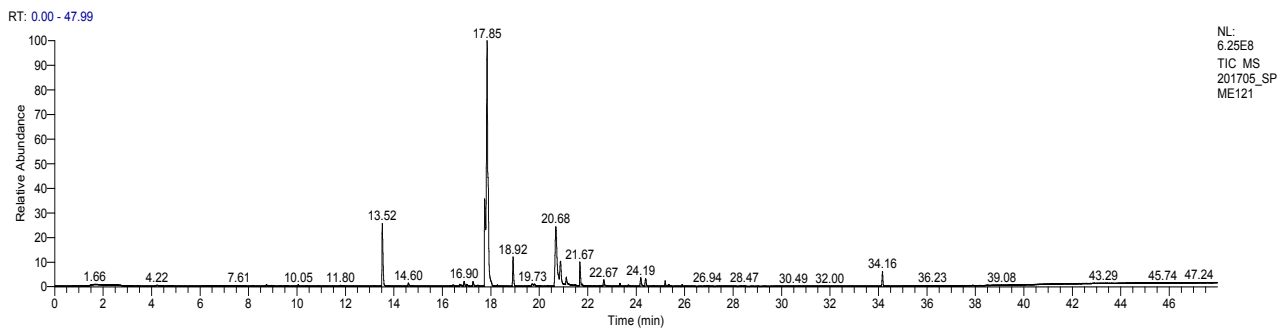

(c)

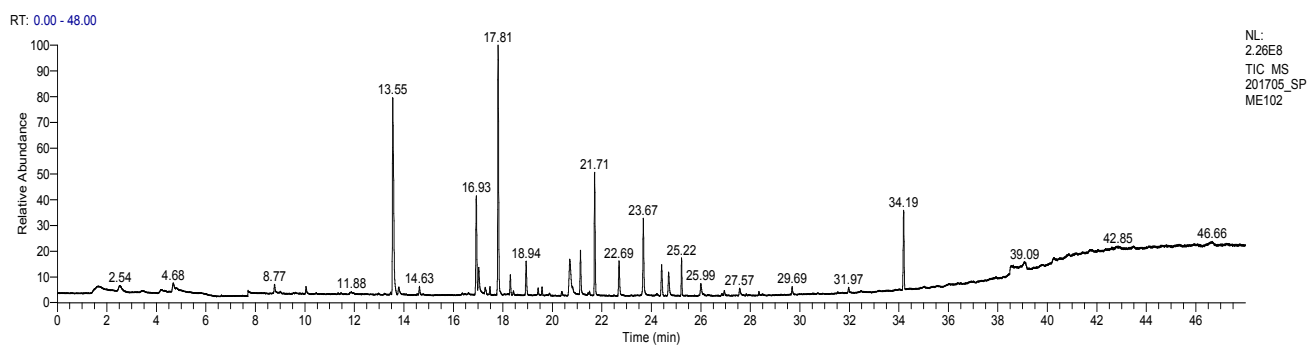

(d)

Fig. S2

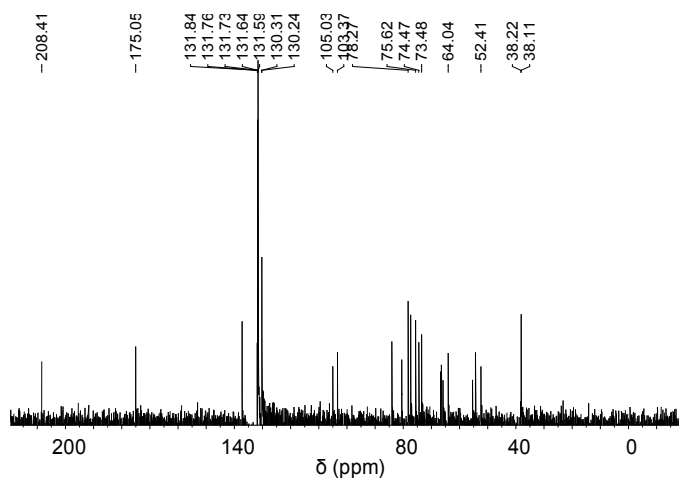

(a)

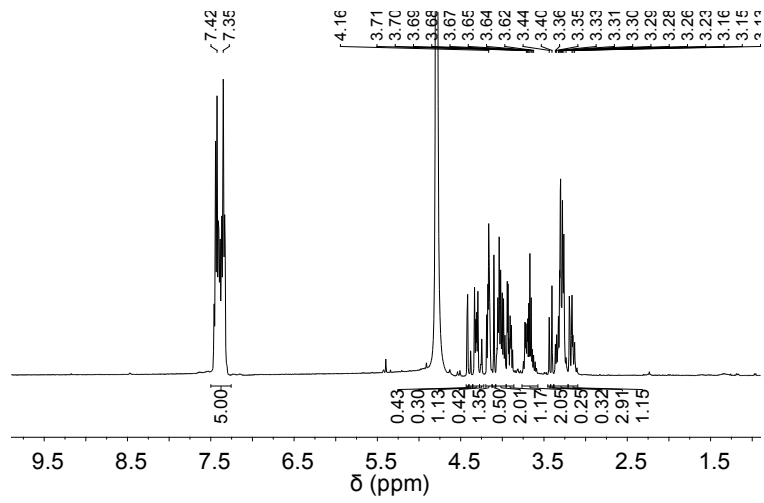

(b)

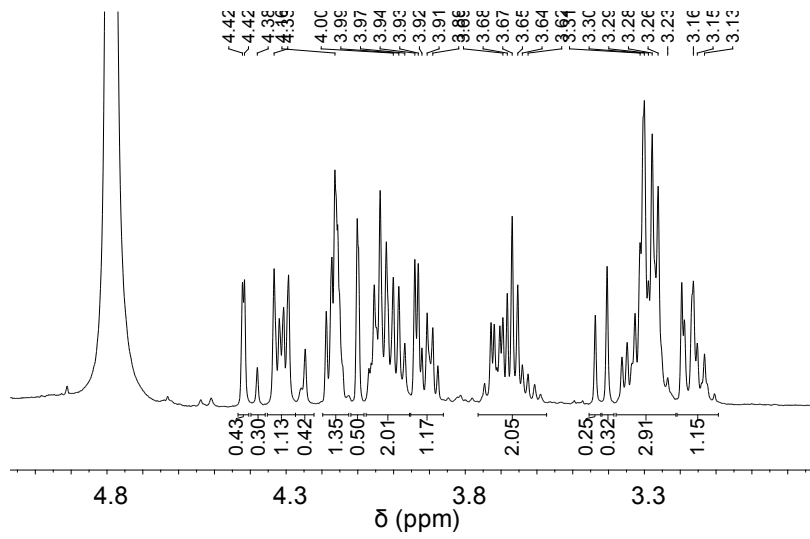

(c)
